# Supplementary material for: Phase I Dose-Escalation and -Expansion Study of Telisotuzumab (ABT-700), an Anti–c-Met Antibody, in Patients with Advanced Solid Tumors
Source: Oxford University Press journal article supplement (doi:10.1158/1535-7163.mct-19-0529), 2020-03-03

**Supplementary Data**

**Supplementary Figure S1.** Progression-free survival in *MET*-amplified patients. Patient numbers correspond to **Figure 2**. Green bars denote *MET*-amplified patients who achieved a partial response. aPatient did not have postbaseline tumor assessment.


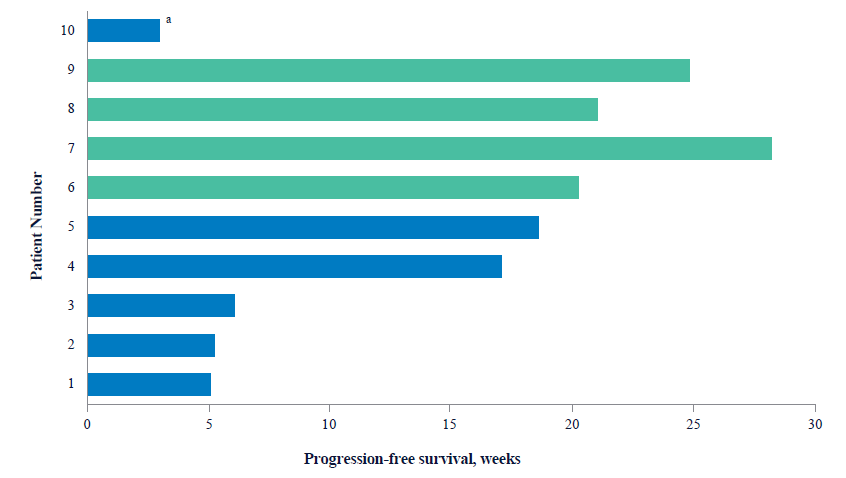

Supplement: 15357163mct190529-sup-222657_2_supp_5995559_q3hhw0.docx [file 15357163mct190529-sup-222657_2_supp_5995559_q3hhw0.docx]
