# Supplementary material for: Phase I Dose-Escalation and -Expansion Study of Telisotuzumab (ABT-700), an Anti–c-Met Antibody, in Patients with Advanced Solid Tumors
Source: Oxford University Press journal article supplement (doi:10.1158/1535-7163.mct-19-0529), 2020-03-03
Supplement: 15357163mct190529-sup-222657_2_supp_5995568_q3hhw0.docx [file 15357163mct190529-sup-222657_2_supp_5995568_q3hhw0.docx]

**Supplementary Data**

**Supplementary Figure S2.** CEA response over time in a 47-year-old patient with GEC responding to telisotuzumab


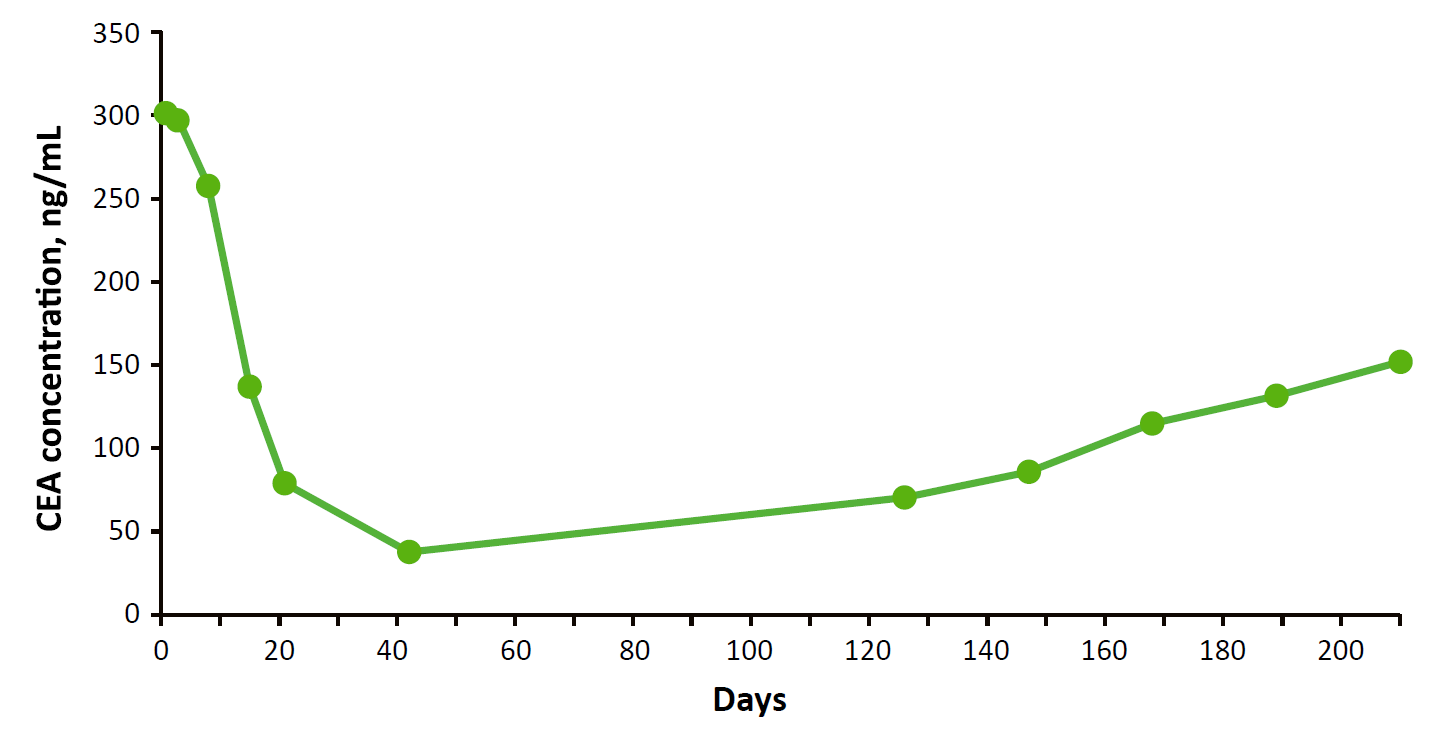


CEA, carcinoembryonic antigen; GEC, gastric or esophageal cancer.
